# Supplementary material
Source: publisher figshare collection journal article supplement (https://springernature.figshare.com/articles/dataset/_/7598066)

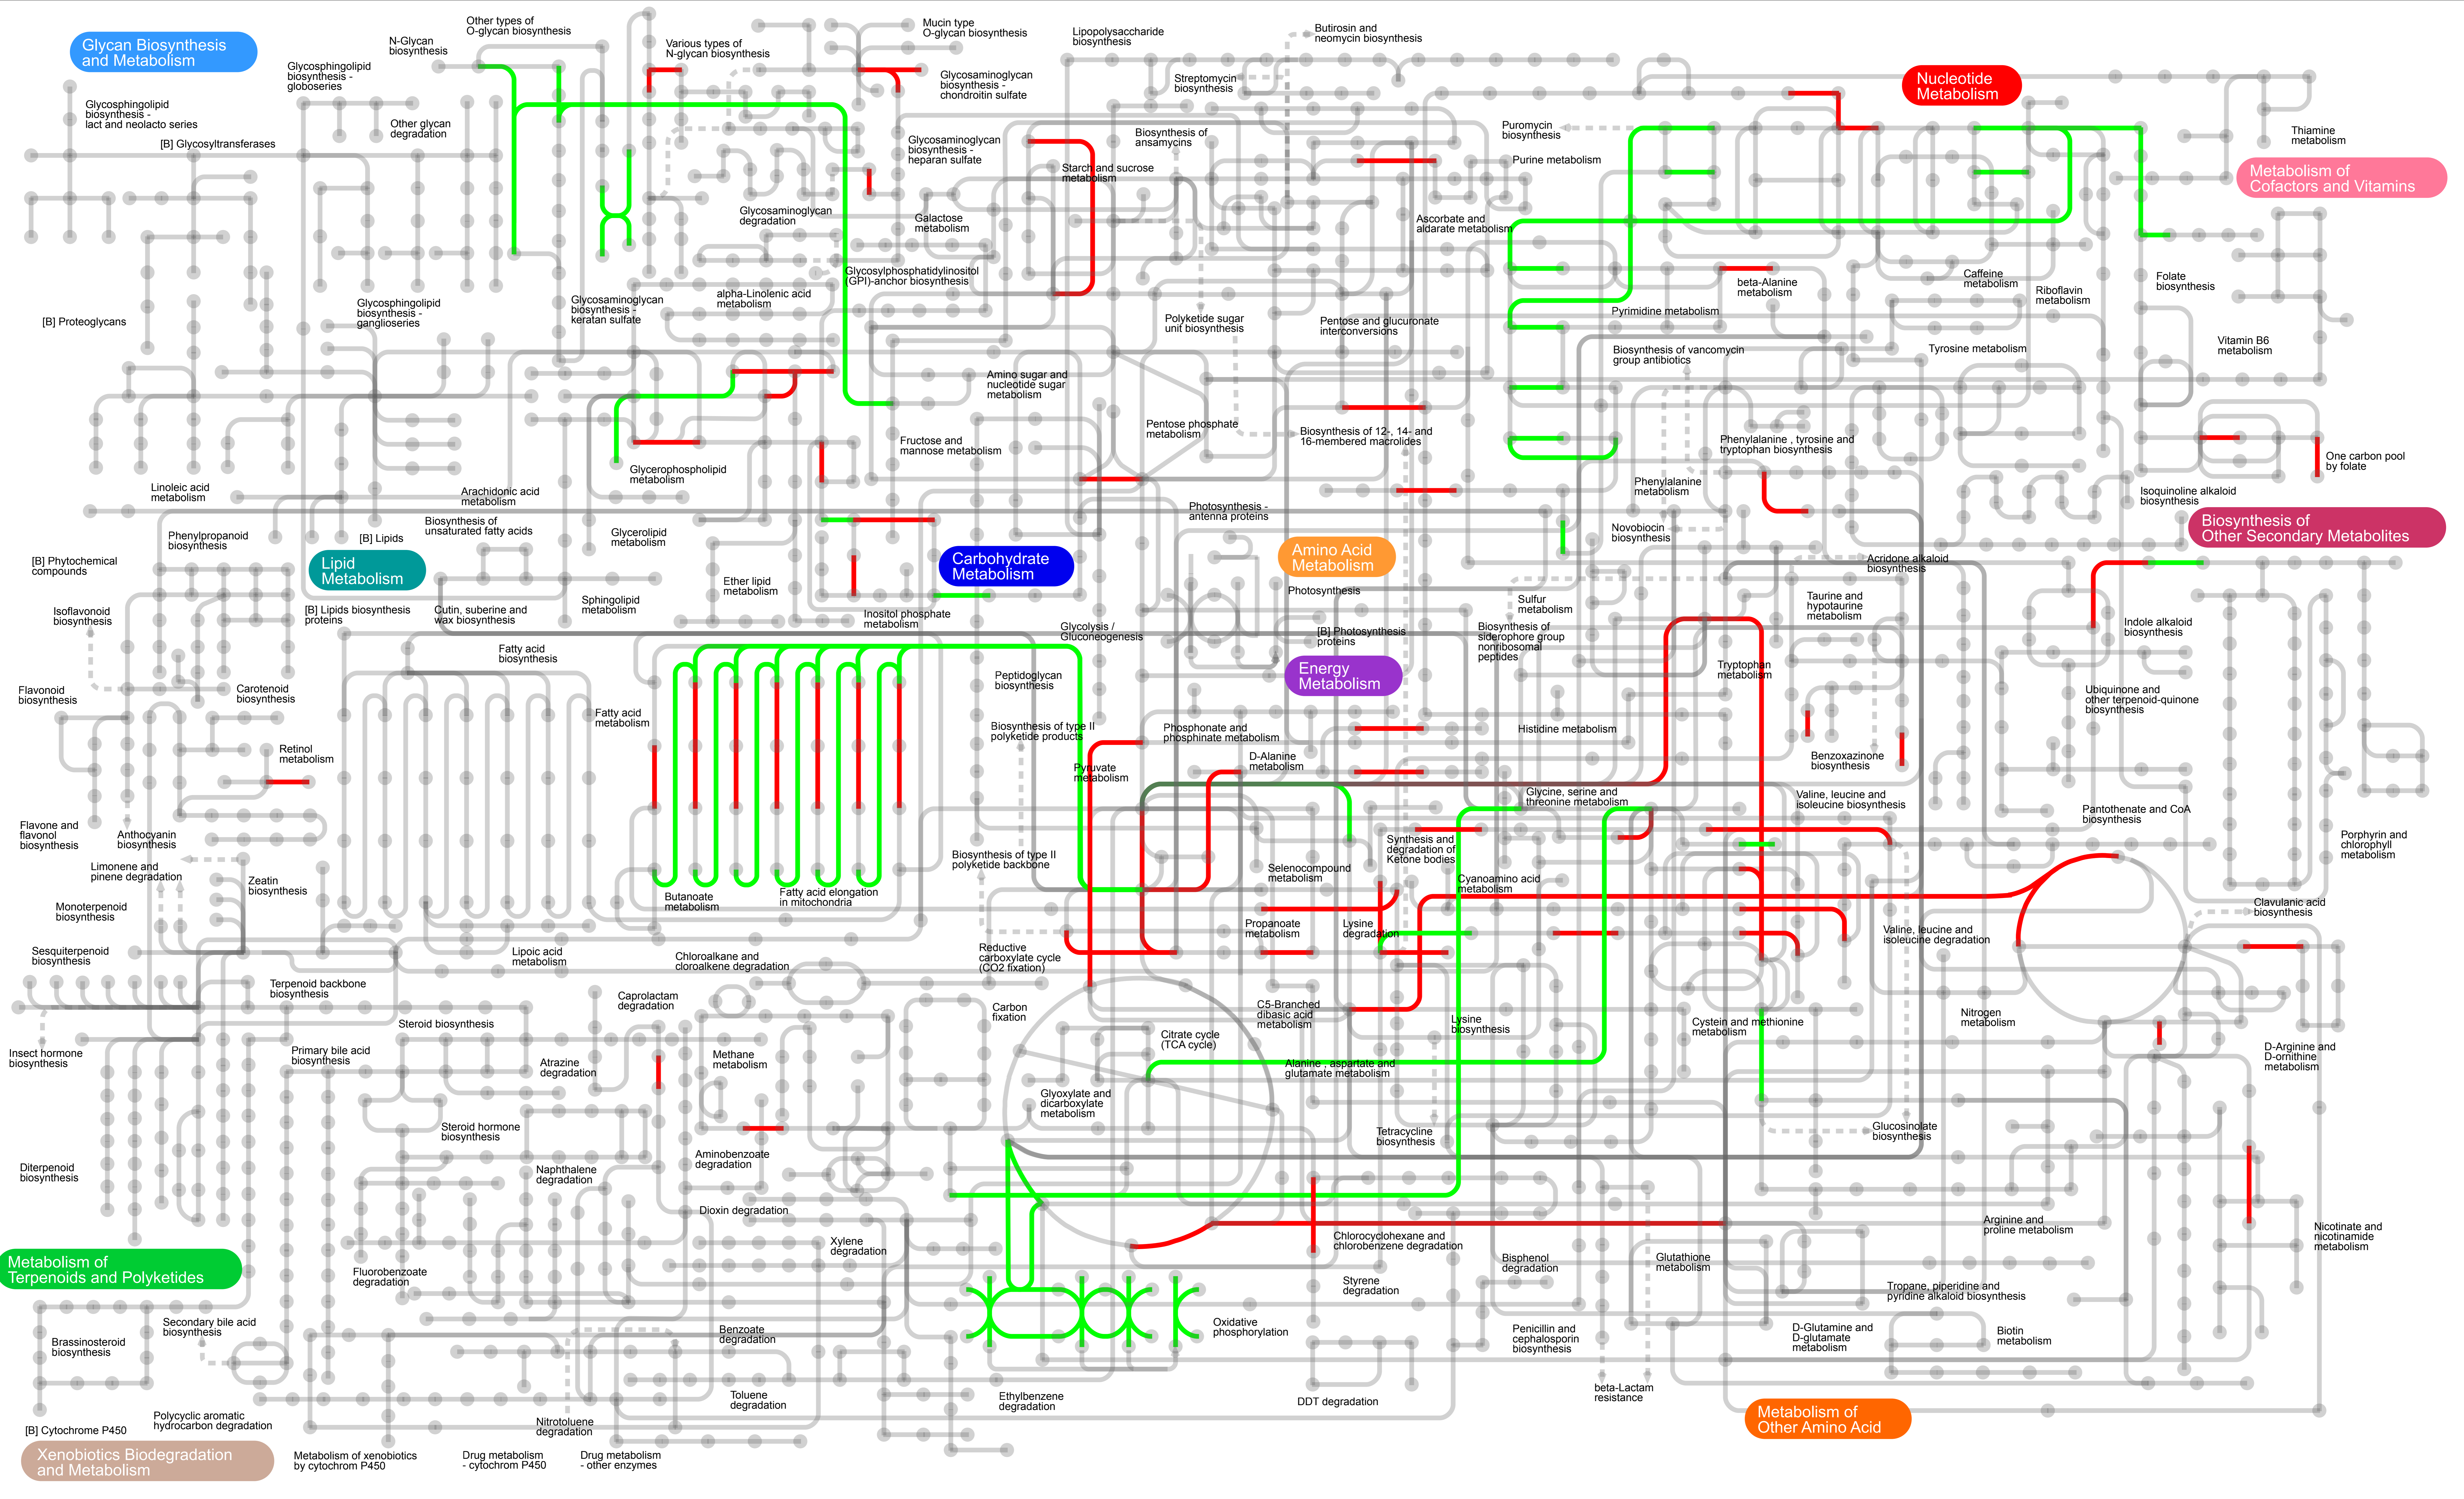

Supplement: Supplementary file [file 14106335]
